# Supplementary material for: Metabolic dysfunction-associated fatty liver disease related hepatocellular carcinoma in China: An increasing problem: Letter to the edior on “Global prevalence of metabolic dysfunction-associated fatty liver disease-related hepatocellular carcinoma: A systematic review and meta-analysis”
Source: PubMed Central journal article supplement — Clin Mol Hepatol. 2024 Jun 18;30(4):965–9. doi: 10.3350/cmh.2024.0386 (PMC11540408; doi:10.3350/cmh.2024.0386), 2024-06-18
Supplement: cmh-2024-0386-Supplementary-Table-1.pdf [file cmh-2024-0386-Supplementary-Table-1.pdf]

**Supplementary Table 1.** Comparison of clinical characteristics among single-MAFLD, mixed-MAFLD and non-MAFLD HCC population

| Characteristic                       | Overall<br>(n=2,831) | Single-MAFLD HCC<br>(n=83) | Mixed-MAFLD HCC<br>(n=502)        | Non-MAFLD HCC<br>(n=2,246)     |
|--------------------------------------|----------------------|----------------------------|-----------------------------------|--------------------------------|
| Age (years)                          | 58 (51, 66)          | 68 (61, 73)*               | 58 (51, 65) <sup>†</sup>          | 58 (51, 66)                    |
| Male (%)                             | 2,372 (83.79)        | 58 (69.88)*                | 435 (86.65) <sup>†</sup>          | 1,879 (83.66)                  |
| Metastases (%)                       | 41 (1.45)            | 1 (1.22)                   | 2 (0.40)                          | 38 (1.69) <sup>‡</sup>         |
| Liver cirrhosis (%)                  | 1,486 (52.49)        | 24 (28.92)*                | 272 (54.18) <sup>†</sup>          | 1,190 (52.98)                  |
| Invasion of nerve or lymph nodes (%) | 47 (1.94)            | 1 (1.33)                   | 5 (1.11)                          | 41 (2.16)                      |
| Portal vein tumor thrombus (%)       | 249 (9.45)           | 3 (3.85)                   | 37 (7.81)                         | 209 (10.04)                    |
| Multiple tumors (%)                  | 330 (13.06)          | 5 (6.41)                   | 47 (9.98)                         | 278 (14.05) <sup>‡</sup>       |
| Maximum tumor diameter (cm)          | 3.80 (2.50, 6.00)    | 3.50 (2.50, 6.00)          | 3.50 (2.20, 6.00)                 | 4.00 (2.50, 6.13) <sup>‡</sup> |
| Alpha fetoprotein (ng/mL)            | 24.70 (4.63, 361.30) | 5.50 (2.90, 107.47)*       | 13.00 (4.21, 141.98) <sup>‡</sup> | 30.60 (4.90, 489.34)           |
| Platelet count (×10 <sup>9</sup> )   | 154 (107, 204)       | 156 (110, 207)             | 151 (108, 200)                    | 155 (107, 205)                 |

Continuous values are presented as median (interquartile range) and categorical variables as frequency (percentage).

MAFLD, metabolic dysfunction-associated fatty liver disease; HCC, hepatocellular carcinoma;

\* $P < 0.05$  Non-MAFLD HCC vs. Single-MAFLD HCC. <sup>†</sup> $P < 0.05$  Single-MAFLD HCC vs. Mixed-MAFLD HCC. <sup>‡</sup> $P < 0.05$  Mixed-MAFLD HCC vs. Non-MAFLD HCC.
